# Supplementary material
Source: PubMed Central journal article supplement (PMC7707554)
Supplement: NIHMS1649041-supplement-sup_01.pdf [file NIHMS1649041-supplement-sup_01.pdf]

---

**Supplementary Table S1. Inclusion and Exclusion Criteria**

---

**Inclusion Criteria**

Age 70 years or older

At increased risk for serious fall injuries (“yes” response to one or more of three screening questions)

1. have you fallen and hurt yourself in past year?
2. have you fallen 2 or more times in past year?
3. are you afraid that you might fall because of balance or walking problems?

**Exclusion Criteria**

Did not receive primary care at assigned practice

Planned to move out of area in coming year

Resided in nursing home

Was enrolled in hospice or reported being too ill to participate

Did not speak English or Spanish

Not capable of providing informed consent (or assent) because of impairments in cognition/hearing and surrogate was not available

---

# Falls and Older Adults

## If You Fall

Whether you're at home or somewhere else, a sudden fall can be startling and upsetting. If you do fall, stay as calm as possible. Take several deep breaths to try to relax.

## How to Get Up From a Fall

1. Remain still on the floor or ground for a few moments. This will help you get over the shock of falling.
2. Decide if you're hurt before getting up. Getting up too quickly or in the wrong way could make an injury worse.
3. If you think you can get up safely without help, roll over onto your side.
4. Rest again while your body and blood pressure adjust. Slowly get up on your hands and knees, and crawl to a sturdy chair.
5. Put your hands on the chair seat and slide one foot forward so that it is flat on the floor. Keep the other leg bent so the knee is on the floor.
6. From this kneeling position, slowly rise and turn your body to sit in the chair.

If you're hurt or can't get up on your own, ask someone for help or call 911. If people who are nearby do not feel confident in helping you get up, call 911. If you're alone, try to get into a comfortable position and wait for help to arrive.

## Consider Emergency Response Devices

If you are often alone, and at increased risk of falling, consider getting a personal emergency response system. This service, which works through your telephone line, provides a button or bracelet to wear at all times in your home.

## Tell Your Doctor

Be sure to discuss any fall with your doctor. The doctor can assess whether a medical issue or other cause of the fall needs to be addressed. Knowing the cause can help you plan to prevent future falls. After a fall, your doctor might refer you to other health care providers who can help prevent future falls.

Note: The content of this document was slightly adapted from information produced by the National Institute on Aging (NIA) at the National Institutes of Health (NIH), available online through the NIHSeniorHealth, a web resource for older adults developed by the National Library of Medicine (NLM) in partnership with NIA: <http://nihseniorhealth.gov/falls/ifyoufall/01.html/National>

# Las caídas y los adultos mayores

## Si usted se cae

Una caída repentina, ya sea en casa u otro lugar, puede sobresaltar y disgustar. Si se cae, mantenga la mayor calma posible. Tome varias respiraciones profundas para tratar de relajarse.

## Cómo levantarse de una caída

1. Quédese quieto en el suelo por unos instantes. Esto le ayudará a recuperarse del shock de la caída.
2. Antes de levantarse, fíjese si se ha herido. Si se levanta demasiado rápido o mal, podría empeorar la lesión.
3. Si cree que puede levantarse de manera segura sin ayuda, ruédese a un lado.
4. Descanse otra vez mientras su cuerpo se ajusta a la presión arterial. Levántese lentamente apoyándose en las manos y las rodillas y vaya a gatas a una silla firme.
5. Coloque las manos en el asiento y deslice un pie hacia delante de forma que quede plano contra el suelo. Mantenga la otra pierna doblada con la rodilla en el suelo.
6. Desde esta posición arrodillada, levante lentamente y gire el cuerpo y siéntese en la silla.

Si se ha herido o no puede levantarse solo, pida ayuda o llame al 911. Si las personas que están cerca no se sientan capaces de ayudarlo a levantarse, llame al 911. Si está solo, trate de entrar una posición cómoda y espere a que llegue la ayuda.

## Considere los dispositivos de respuesta a emergencias

Si está a menudo a solas y tiene un riesgo mayor de caerse, considere comprar un sistema personal de respuesta a emergencias. Este servicio telefónico le da un botón o una pulsera para que use en todo momento en su casa.

## Dígale a su médico

Asegúrese de hablar de cualquier caída con su médico. Puede determinar si hay que responder al problema médico o la causa de la caída. Saber la causa puede ayudarlo a planificar para evitar otras caídas. Después de una caída, su médico lo puede referir a otros profesionales de la salud que pueden ayudarlo a prevenir otras caídas.

Nota: El contenido de este documento fue adaptado ligeramente de información producida por el Instituto Nacional sobre el Envejecimiento (NIA) de los Institutos Nacionales de Salud (NIH), y está disponible en línea en NIHSeniorHealth, un recurso web para adultos mayores preparado por la Biblioteca Nacional de Medicina (NLM) en colaboración con el NIA: <http://nihseniorhealth.gov/falls/ifyoufall/01.html/National>

**Supplementary Table S2.** Losses to Follow-up from Death and Study Withdrawals by Subsample Status, Age, and Sex

| Characteristics    | Subsample <sup>a</sup> | Enrolled |     | Died, not Withdrawn |                   | Withdrawn |         |                   |
|--------------------|------------------------|----------|-----|---------------------|-------------------|-----------|---------|-------------------|
|                    |                        | N        | n   | percent             | rate <sup>b</sup> | n         | percent | rate <sup>b</sup> |
| Overall            | No                     | 4,737    | 346 | 7.3                 | 2.4               | 456       | 9.6     | 3.2               |
|                    | Yes                    | 714      | 93  | 13.0                | 3.9               | 115       | 16.1    | 4.9               |
| Age, y             |                        |          |     |                     |                   |           |         |                   |
| 70-74 <sup>c</sup> | No                     | 1,037    | 31  | 3.0                 | 1.1               | 49        | 4.7     | 1.7               |
| 75-79              | No                     | 1,585    | 76  | 4.8                 | 1.5               | 141       | 8.9     | 2.8               |
|                    | Yes                    | 272      | 27  | 9.9                 | 2.9               | 39        | 14.3    | 4.2               |
| 80-84              | No                     | 1,116    | 96  | 8.6                 | 2.8               | 111       | 9.9     | 3.2               |
|                    | Yes                    | 228      | 18  | 7.9                 | 2.3               | 40        | 17.5    | 5.1               |
| 85+                | No                     | 999      | 143 | 14.3                | 5.0               | 155       | 15.5    | 5.4               |
|                    | Yes                    | 214      | 48  | 22.4                | 7.3               | 36        | 16.8    | 5.4               |
| Sex                |                        |          |     |                     |                   |           |         |                   |
| Men                | No                     | 1,772    | 170 | 9.6                 | 3.2               | 171       | 9.7     | 3.2               |
|                    | Yes                    | 298      | 56  | 18.8                | 5.8               | 43        | 14.4    | 4.5               |
| Women              | No                     | 2,963    | 176 | 5.9                 | 2.0               | 285       | 9.6     | 3.2               |
|                    | Yes                    | 416      | 37  | 8.9                 | 2.6               | 72        | 17.3    | 5.1               |

<sup>a</sup>For participants in the subsample, information was also collected on a set of secondary well-being outcomes at baseline, 12 months, and 24 months.

<sup>b</sup>Per 100 person-years of follow-up.

<sup>c</sup>Enrollment of the subsample was completed before the age criterion was lowered from 75 to 70 years.

**Supplementary Table S3.** Losses to Follow-up from Death and Study Withdrawals by Subsample Status, Age, and Sex among Participants Who Were Enrolled Contemporaneously<sup>a</sup>

| Characteristics | Subsample <sup>b</sup> | Enrolled |     | Died, not Withdrawn |                   | Withdrawn |         |                   |
|-----------------|------------------------|----------|-----|---------------------|-------------------|-----------|---------|-------------------|
|                 |                        | N        | n   | percent             | rate <sup>c</sup> | n         | percent | rate <sup>c</sup> |
| Overall         | No                     | 1,214    | 129 | 10.6                | 3.1               | 194       | 16.0    | 4.7               |
|                 | Yes                    | 714      | 93  | 13.0                | 3.9               | 115       | 16.1    | 4.9               |
| Age, y          |                        |          |     |                     |                   |           |         |                   |
| 75-79           | No                     | 458      | 26  | 5.7                 | 1.6               | 62        | 13.5    | 3.8               |
|                 | Yes                    | 272      | 27  | 9.9                 | 2.9               | 39        | 14.3    | 4.2               |
| 80-84           | No                     | 389      | 49  | 12.6                | 3.7               | 61        | 15.7    | 4.6               |
|                 | Yes                    | 228      | 18  | 7.9                 | 2.3               | 40        | 17.5    | 5.1               |
| 85+             | No                     | 367      | 54  | 14.7                | 4.6               | 71        | 19.3    | 6.0               |
|                 | Yes                    | 214      | 48  | 22.4                | 7.3               | 36        | 16.8    | 5.4               |
| Sex             |                        |          |     |                     |                   |           |         |                   |
| Men             | No                     | 463      | 61  | 13.2                | 3.9               | 77        | 16.6    | 4.9               |
|                 | Yes                    | 298      | 56  | 18.8                | 5.8               | 43        | 14.4    | 4.5               |
| Women           | No                     | 749      | 68  | 9.1                 | 2.7               | 117       | 15.6    | 4.6               |
|                 | Yes                    | 416      | 37  | 8.9                 | 2.6               | 72        | 17.3    | 5.1               |

<sup>a</sup>As noted in the text, participants in the subsample were enrolled earlier in the trial before the age criterion was lowered from 75 to 70 years.

<sup>b</sup>For participants in the subsample, information was also collected on a set of secondary well-being outcomes at baseline, 12 months, and 24 months.

<sup>c</sup>Per 100 person-years of follow-up.

## Supplementary Document S2

### ACKNOWLEDGEMENTS

#### The STRIDE Study Team

##### *Joint Principal Investigators:*

Shalender Bhasin MB, BS, Communicating PI and Chair of the Steering and Publications Committees, and Central Project Management (Brigham and Women's Hospital, Harvard Medical School, Boston, MA)

Thomas M. Gill MD, PI and Chair of Protocol and Recruitment Committees (Yale School of Medicine, New Haven, CT)

David B. Reuben MD, PI and Chair of Intervention Committee (David Geffen School of Medicine at UCLA, Los Angeles, CA)

##### *School of Nursing, University of Minnesota*

Siobhan McMahon PhD MPH GNP-BC (Nursing Director)

##### *Central Project Management, Brigham and Women's Hospital, Boston, MA:*

Shalender Bhasin (PI), Nancy K. Latham PhD PT (Study Director), Shehzad Basaria MD (Chief Medical Safety Officer), Brooke Brawley (cIRB Liaison), Richard Eder BA, Amy Larson MHA (Administrative Director), Lori Goehring BA (Study Manager), Molly Lukas BS, Scott Margolis MBA, Thomas W. Storer PhD, Martha B. Carnie AS, Priscilla Gazarian PhD RN [University of Massachusetts Boston, Boston, MA], Maureen Fagan DNP MHA FNP-BC [University of Miami Health System, Miami, FL]

##### *Data Coordinating Center, Yale University, New Haven, CT:*

Peter Peduzzi (Director) PhD, James Dziura PhD, Denise Esserman PhD, Erich J. Greene PhD, Can Meng PhD, Heather Allore PhD, Charles Lu PhD, Haseena Rajeevan PhD, Liliya Katsoyich MA MBA CCRP, Rixin Wang PhD, Brian Funaro, Nancy Lorenze DNSc, Margaret Doyle MPH, Bridget Mignosa, Geraldine Hawthorne-Jones, Michael E. Miller PhD (Wake Forest), Thomas G. Trivison PhD (Harvard), Peter Charpentier MPH (Chair of Data Management Committee), Katy Araujo MPH (Co-Chair of Data Management Committee)

##### *Yale School of Medicine, New Haven, CT:*

##### *Geriatric Medicine:*

Dorothy Baker PhD

##### *Recruitment and Assessment Center:*

Joanne M. McGloin MDiv, MS, MBA, Amy Shelton MPH, Eleni A Skokos BS MS, Sui Tsang BS, Mara Abella, Carol Gordon, Luann Bianco, Rina Castro, Sabina Rubeck, Barbara Foster, Karen Wu, David Nock, Crysta Collins, Eloisa Martinez (UTMB), Leo Sherman (Mt. Sinai)

*Clinical Trial Sites*

*Essentia Health, Duluth, MN*

Site Principal Investigator: Stephen C. Waring, DVM, PhD, Fall Care Managers: Erica Chopskie BS, RN and Heather Larsen BA, RN, Allise Taran MPH, Joseph Bianco MD, Margaret Hoberg CNP, Hillary Henzler-Buckingham

*HealthCare Partners, El Segundo, CA*

Site Principal Investigator: Jeremy Rich, DPM, Fall Care Manger: Vivian Chavez RN, Christine Moore, Janelle Howe, Rosario Garcia, Jocelyn Nunez, Samuel Ho MD, Yan Chen, MD

*Johns Hopkins Medicine, Baltimore MD*

Site Principal Investigator: Albert W. Wu MD MPH, Jeremy D. Walston, MD, Yuri Agrawal MD, Patti Ephraim MPH; Fall Care Manager: Tiffany Campbell BSN, RN, BMTCN, OCN; Johns Hopkins Community Physicians: Steven Kravet, MD MBA, Michael Albert MD, Bimal Ashar MD, Bernard Birnbaum MD, Sajida Chaudry MD, LaToya Edwards MD, Scott Feeser MD, Naaz Hussain MD, Amrish Joseph MD, Kimberly Larsen MD, Alice Lee MD, Obafemi Okuwobi MD, and Tara Scheck MD.

*Mercy Health Network (Des Moines, IA) and University of Iowa (Iowa City, IA)*

Site Principal Investigator: Robert Wallace MD, MSc, Co-Site Principal Investigator: Carri Casteel PhD, MPH; Fall Care Manager: Angela Shanahan RN-BC, BSN, Julie Weldon MSN RN, Anita Leveke RN, BSN, CEN, Charles Keller MD, Jeffrey Reist BS, PharmD, BCPS; David Sweiskowski MD

*Michigan Medicine, University of Michigan, Ann Arbor, MI*

Site Principal Investigator: Neil Alexander MD, Jocelyn Wiggins BM BCh, Fall Care Managers: Karen Burek RN MS ANP-BC and Tina Ledesma RN BSN, Linda V. Nyquist PhD, Nancy (Amby) Gallagher, PhD, APRN-BC, Catherine Hanson BA

*Mount Sinai Health System, New York, NY*

Site Principal Investigator: Fred Ko MD MS, Albert L. Siu MD MPH, Rosanne M. Leipzig MD PhD, Christian Espino BA, Ravishankar Ramaswamy MD MS, Fall Care Managers: Deborah West RN BS and Deborah Matza RN MPH

*Partners Healthcare, Boston, MA*

Site Principal Investigator: Patricia Dykes, RN, PhD, MA, Hilary Stenvig BS, Kety FlorGomes BA, RN BSN , Taylor Christiansen BS, Alejandra Salazar PharmD, Laura Frain MD, Ariela Orkaby MD MPH, Jonathan Bean MD Fall Care Managers: Yvette Wells RN and Cathy Foskett RN

*Reliant Medical Group, Worcester, MA*

Site Principal Investigator: Jerry H. Gurwitz MD, Allison Richards BA, Azraa Amroze BS, Lawrence Garber MD, Fall Care Managers: Peggy Preusse RN and Anne McDonald RN

*University of Pittsburgh Medical Center, Pittsburgh, PA*  
Site Principal Investigator: Susan L. Greenspan, MD, Fall Care Manager: Mary Anne Ferchak RN BS, Madeline Rigatti BS,

*University of Texas Medical Branch at Galveston, Galveston, TX*  
Site Principal Investigator: Elena Volpi MD, Fall Care Manager: Summer Chapman RN MSN, Roxana Hirst MS CCRP, Eloisa Martinez BS, CCRP, Mukaila Raji MD, MS

*STRIDE Committee Chairs:*

**Clinical Trial Sites:** Jerry H. Gurwitz MD;

**Outcomes:** Jay Magaziner MSHyg PhD (University of Maryland) and Albert L. Siu MD MPH;

**Adjudication:** David A. Ganz MD PhD (UCLA and VA Greater Los Angeles Healthcare System)

**Steering:** Shalender Bhasin MB, BS

**Protocol:** Thomas M. Gill MD

**Screening; Recruitment and Retention:** Joanne M. McGloin M Div, MS, MBA and Thomas M. Gill MD

**Data Management and IT:** Peter Charpentier MPH, Katy Araujo MPH

**Intervention:** David B. Reuben MD

**Safety:** Shehzad Basaria MD

**Falls Care Managers:** Siobhan McMahon PhD RN (University of Minnesota);

**National Patient and Stakeholder:** Maureen Fagan DNP MHA FNP-BC (Chair), Martha B. Carnie AS (Co-Chair), Catherine Hanson BA

**Physical Components:** Pamela W. Duncan PhD, PT (Wake Forest University) and Thomas W. Storer PhD

**FCM Training:** Chad Boulton MD MPH MBA (Johns Hopkins) and Priscilla Gazarian PhD RN

**Ancillary Studies:** James Goodwin MD (UTMB) and Todd Manini PhD (University of Florida)

**Publications:** Shalender Bhasin MB, BS and Peter Peduzzi PhD

*Wake Forest University, Winston-Salem NC*

Kevin P. High MD MS, Lea Harvin, Cindy Stowe

*National Institute on Aging, Bethesda, Maryland:*

Program Officer: Sergei Romashkan MD, Scientific Officer: Rosaly Correa-De-Araujo MD MS PhD, Lyndon Joseph PhD, Marcel Salive MD MPH, Evan C. Hadley MD

*Patient Centered Outcomes Research Institute (PCORI), Washington, D.C.*

Steven B. Clauser PhD MPA

### **Data and Safety Monitoring Board**

A 9-member Data and Safety Monitoring Board, appointed by the National Institute on Aging, oversaw study's progress and safety, and included:

David Buchner MD MPH(Chair); Terry Fulmer PhD RN FAAN; Susan Ellenberg PhD; Bonita Lynn Beattie MPT MHA; Abby C. King PhD; Cynthia J. Brown MD MSPH; Laurence Rubenstein MD; Mary Anne Sterling CEA; Thomas Prohaska PhD; Laurence Friedman MD



## **Funding Support**

The STRIDE study was funded primarily by the Patient Centered Outcomes Research Institute (PCORI), with additional support from the National Institute on Aging (NIA) at NIH. Funding is provided and the award managed through a cooperative agreement (5U01AG048270) between the NIA and the Brigham and Women's Hospital. The project is part of the Partnership for Fall Injuries Prevention between the NIA and PCORI. This research is partially supported by the Boston Claude D. Pepper Older Americans Independence Center at Brigham and Women's Hospital (P30AG013679) and Harvard Catalyst | The Harvard Clinical and Translational Science Center (National Center for Research Resources and the National Center for Advancing Translational Sciences, National Institutes of Health Award UL1TR001102) and financial contributions from Harvard University and its affiliated academic healthcare centers. Support was also provided by the Claude D. Pepper Older Americans Independence Centers at UCLA (P30AG028748); Yale (P30AG021342); Mt Sinai (P30AG2874106); UTMB (P30AG024832), University of Michigan (P30AG024824) and Wake Forest (P30AG021332). Mt Sinai also received support through a grant from the New York Academy of Medicine. Additional support at Yale University was provided by the NIH/National Center for Advancing Translational Sciences Clinical and Translational Science Awards program (UL1TR000142) and an Academic Leadership Award (K07AG043587) to Dr Gill from the National Institute on Aging. Dr. McMahon was supported by grants KL2TR000113 and UL1TR000114. The University of Michigan also received support from Michigan Medicine, its academic healthcare system. The content of this publication is solely the responsibility of the authors and does not necessarily represent the official views of the National Institutes of Health.
